# Supplementary material for: PDL1 is expressed in the islets of people with type 1 diabetes and is up-regulated by interferons-α and-γ via IRF1 induction
Source: PubMed Central journal article supplement — eBioMedicine. 2018 Sep 27;36:367–75. doi: 10.1016/j.ebiom.2018.09.040 (PMC6197434; doi:10.1016/j.ebiom.2018.09.040), 2018-09-27
Supplement: mmc1.pdf [file mmc1.pdf]

## Figure S1

### A Human islets

| Gene  | T1D recent-onset | T1D long-lasting | Control-1 | Control-2 | Control-3 | Median (Control) | Mean (Control) | SD (Control) |
|-------|------------------|------------------|-----------|-----------|-----------|------------------|----------------|--------------|
| CD274 | 15.35            | 1.88             | 3.22      | 2.11      | 4.39      | 3.22             | 3.24           | 1.14         |

### B Human islets

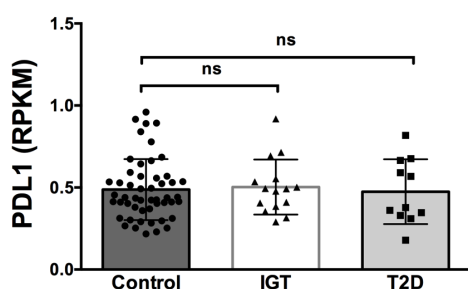

### C Human islets

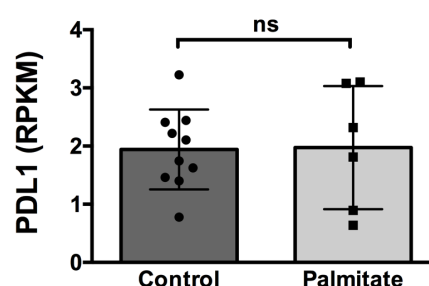

### D Human islets

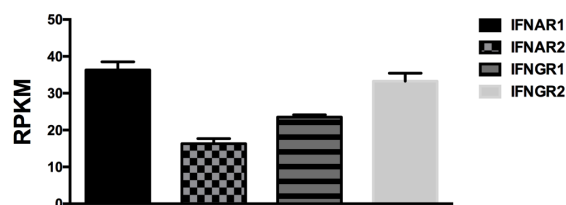

### E

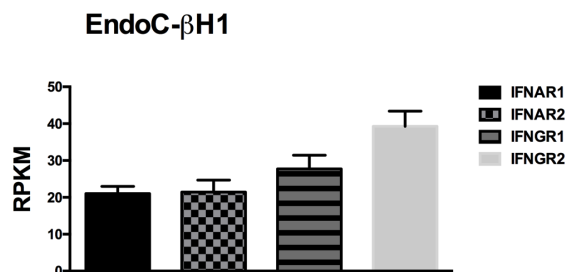

**Figure S1. mRNA expression of PDL1 and type I / II interferon receptors in RNAseq of beta cells at different conditions.**

RNA sequencing data of human islets (**A to D**) or EndoC- $\beta$ H1 cells (**E**) were evaluated for the expression of PDL1 (CD274 gene) or type I and II interferon receptor subunits.

(**A**) RNAseq of pancreatic islets from donors with T1D or healthy controls (1). (**B**) RNAseq of pancreatic islets from donors with different levels of dysglycemia (2). (**C**) RNAseq of pancreatic islets exposed or not to palmitate for 48h (3). (**D and E**) RNAseq of pancreatic islets from healthy donors (4) (**D**) or untreated EndoC- $\beta$ H1 cells (n=3, unpublished data) (**E**) Values are presented as reads per kilobase million (RPKM; mean  $\pm$  standard deviation).

# Figure S2 - All EndoC-βH1

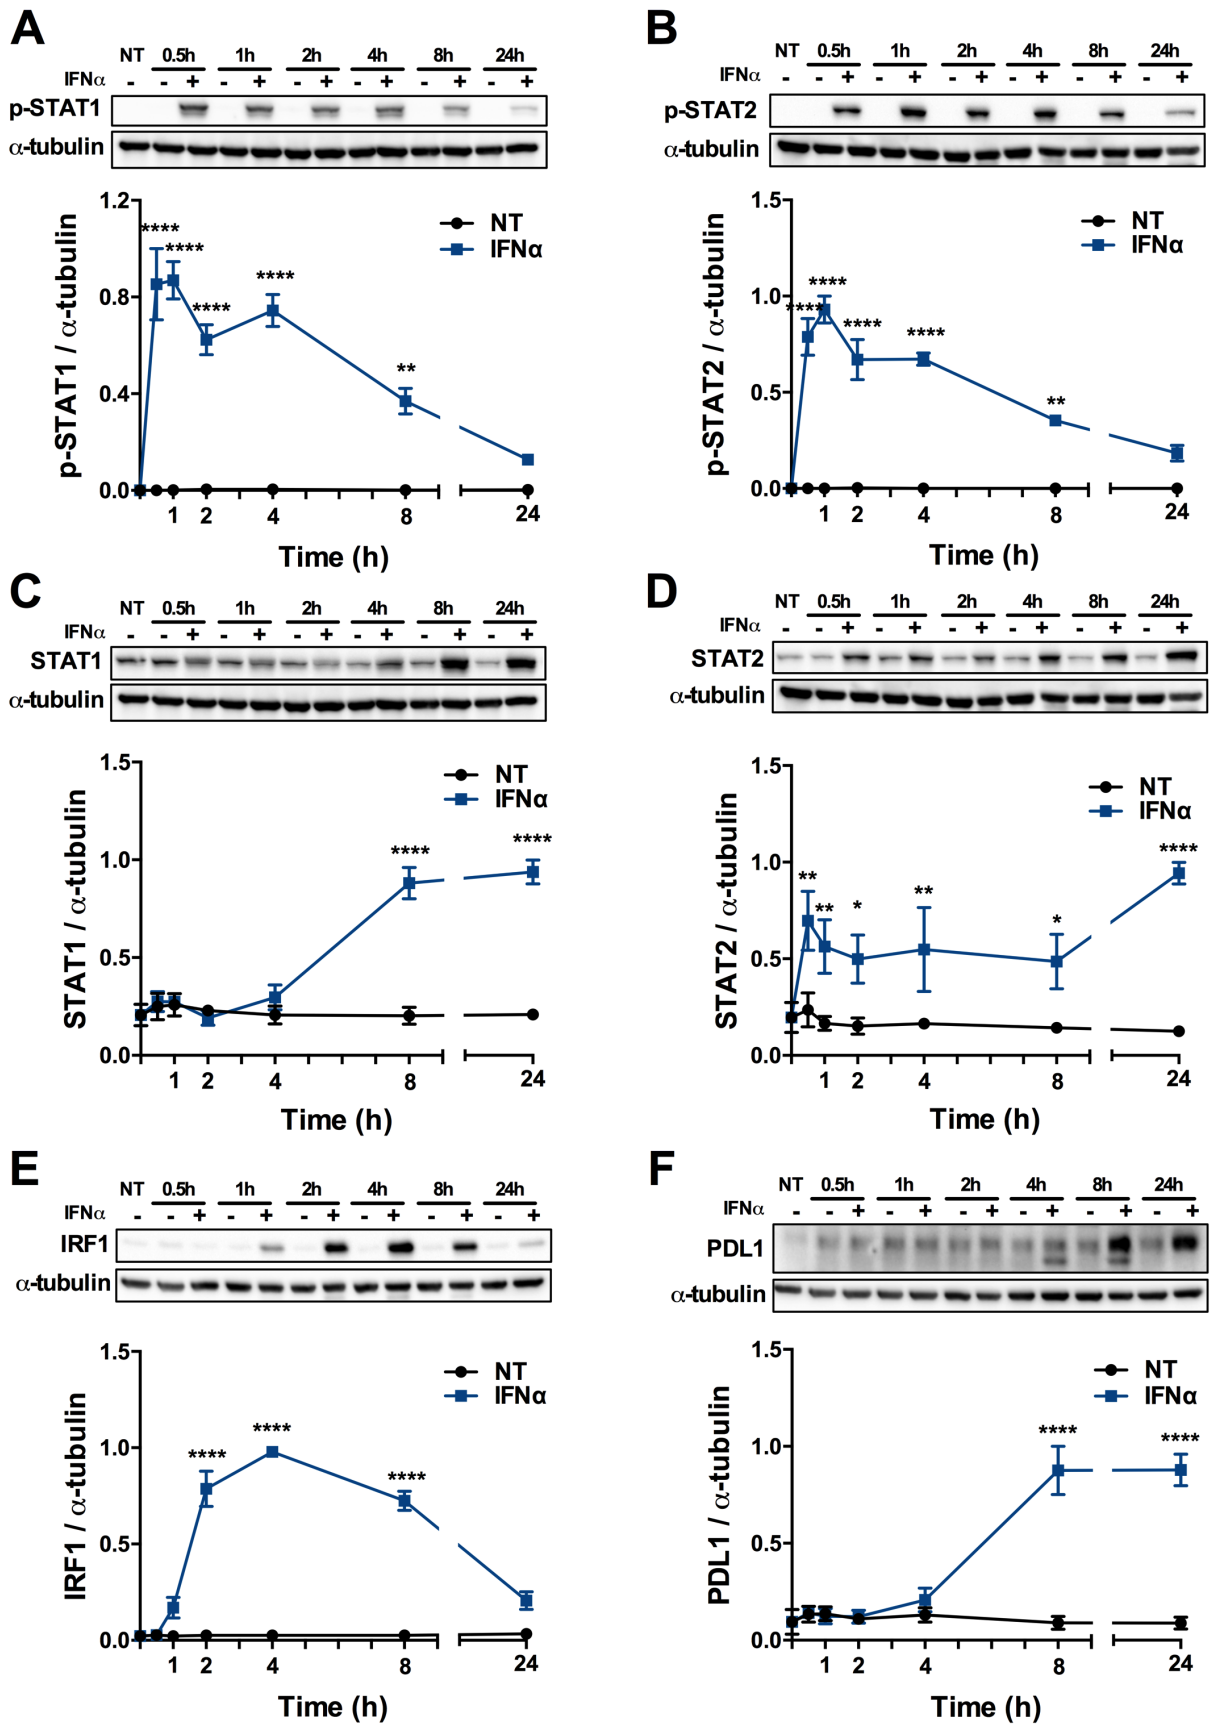

Figure S2. Exposure of beta cells to interferon- $\alpha$  induces an early activation of STAT1/2 and IRF1 followed by up-regulation of PDL1 protein expression.

**(A to F)** EndoC- $\beta$ H1 cells were exposed or not to interferon- $\alpha$  (IFN $\alpha$ , 2000U/ml) for the indicated time-points and then collected for protein analysis by Western blot. Phosphorylated STAT1 **(A)**, phosphorylated STAT2 **(B)**, total STAT1 **(C)** total STAT2 **(D)**, IRF1 **(E)** and PDL1 **(F)** were quantified by densitometry and normalized by the housekeeping protein  $\alpha$ -tubulin and then by the highest value of each experiment considered as 1 (n=4-5, \* p<0.05, \*\* p<0.01, \*\*\* p<0.001, \*\*\*\* p<0.0001, ANOVA with Bonferroni correction). The mean values  $\pm$  SEM are shown.

## Figure S3 - All EndoC-βH1

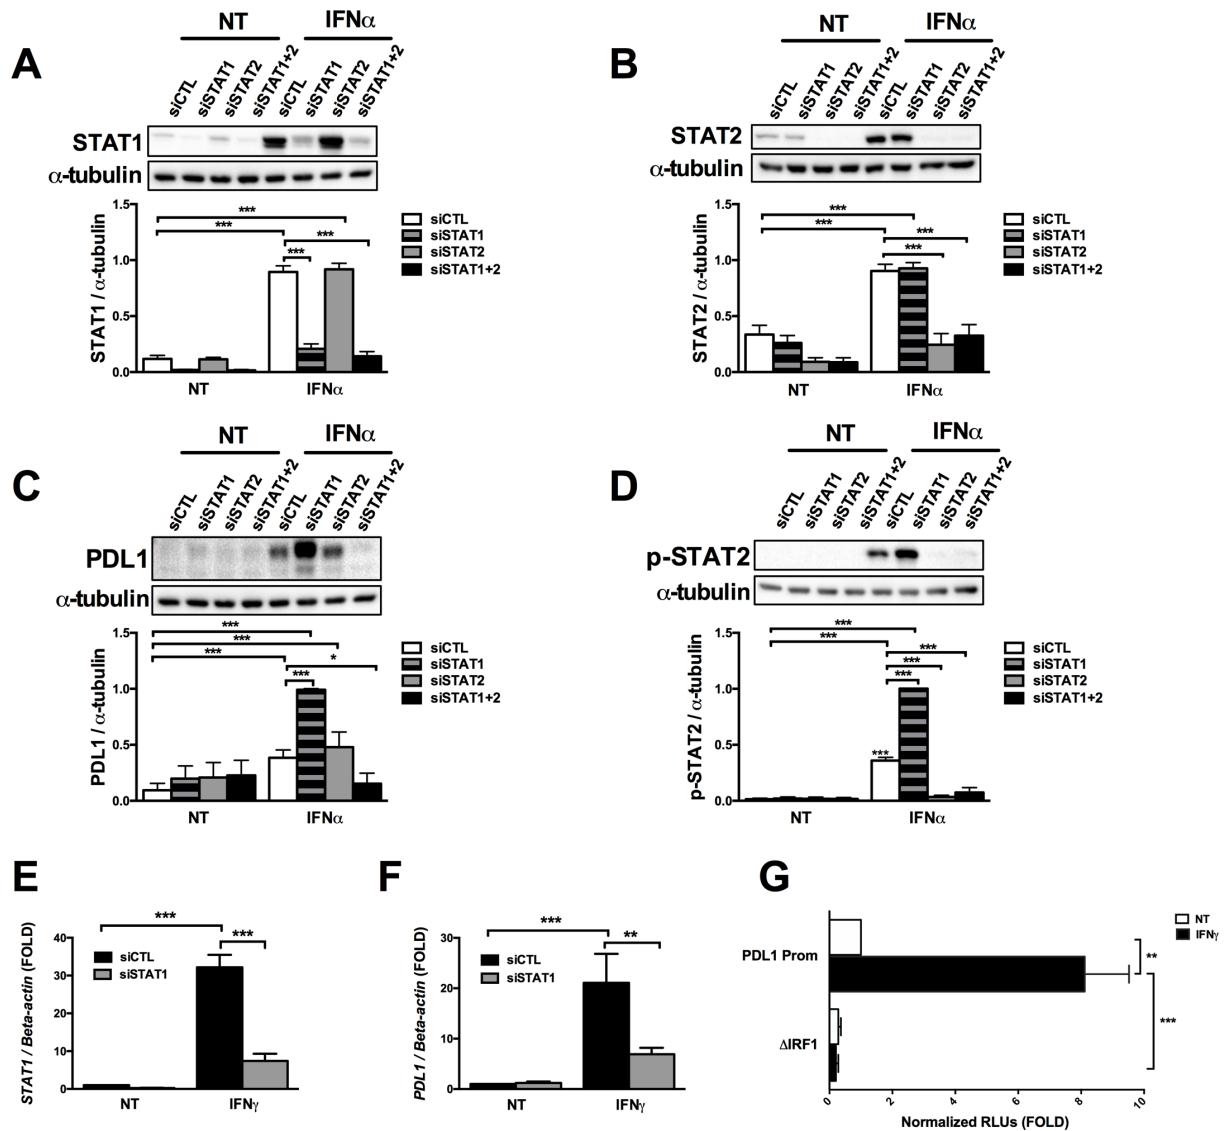

**Figure S3. STAT1 silencing alone increases PDL1 expression via compensatory augmentation in phospho-STAT2, while double knockdown STAT1 + STAT2, prevents interferon- $\alpha$ -induced PDL1 up-regulation.**

(A to F) EndoC- $\beta$ H1 cells were transfected with a control siRNA (siCTL) or siRNAs targeting STAT1, STAT2 or STAT1+2. After 48h of recovery, the cells were treated with IFN $\alpha$  (A to D) or IFN $\gamma$  (E and F) for 24h. Knockdown efficiency and PDL1 induction were evaluated at protein (A, B and C) or mRNA (E and F) levels by Western blot and real time RT-PCR, respectively. Protein expression was quantified by densitometry and normalized by the housekeeping protein  $\alpha$ -tubulin and then by the highest value of each experiment considered as 1. The mRNA values were normalized by the housekeeping gene *beta-actin* and are represented as fold induction compared to non-treated control cells (NT). (n=6, \* p<0.05, \*\* p<0.01, \*\*\* p<0.001, ANOVA with Bonferroni correction).

**(G)** EndoC- $\beta$ H1 cells were transfected with a luciferase construct reporter containing the wild type human PDL1 promoter or the same construct presenting a deletion in the IRF1 binding site plus a pRL-CMV plasmid (used as internal control); cells were then exposed to IFN $\gamma$  for 24h and luciferase activity was assayed. The values were corrected for the activity of the internal control (pRL-CMV) and are presented as normalized relative luciferase units (RLUs) in relation to non-treated cells (NT) considered as 1 (n=3, \*\* p < 0.01, \*\*\* p < 0.001, ANOVA with Bonferroni correction). The mean values  $\pm$  SEM are shown.

## Figure S4 - All Human islets

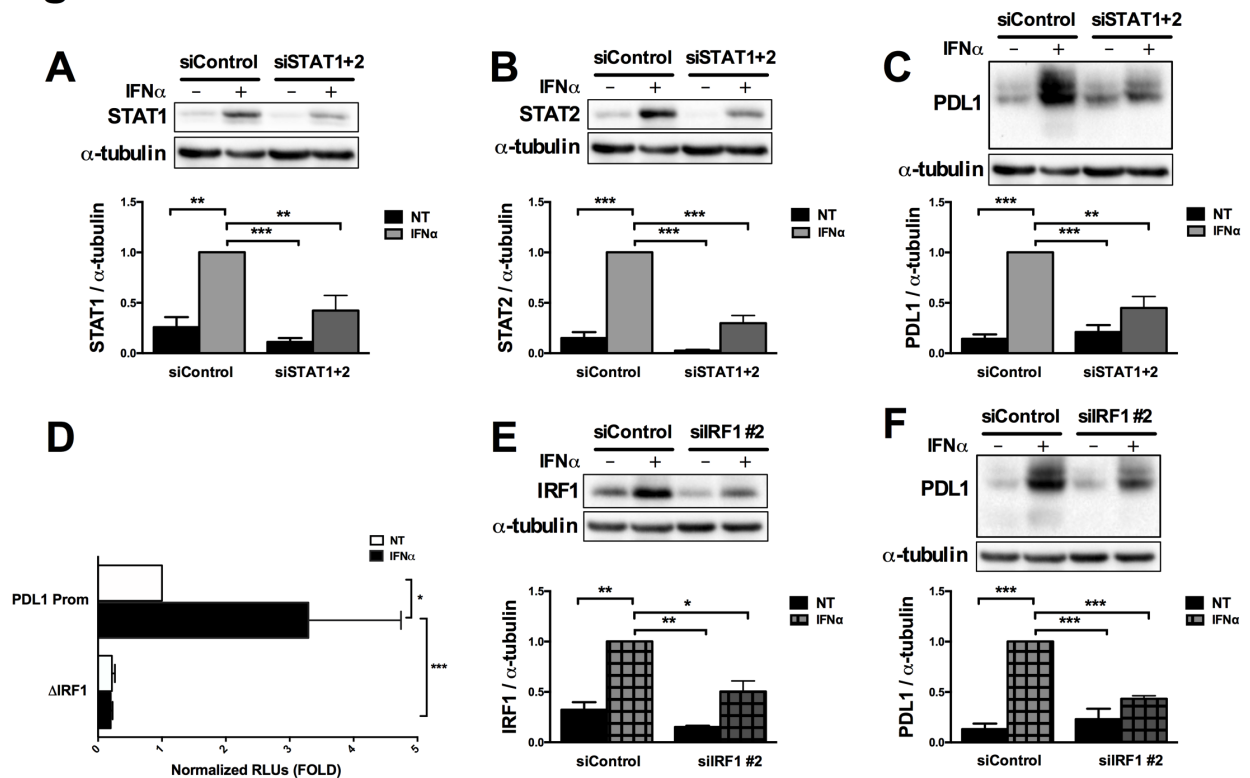

**Figure S4. Interferon- $\alpha$ -induced PDL1 expression in primary human islets depends on both STAT1 + 2 and IRF1.**

Dispersed human islets were transfected with a control siRNA (siCTL) or siRNAs against STAT1+STAT2 (**A to C**) or IRF1 (**E and F**). After 48h of recovery, they were exposed to IFN $\alpha$  for 24h. Knockdown efficiency (**A, B and E**) and PDL1 induction (**C and F**) were evaluated at protein level by Western blot. Protein expression was quantified by densitometry and normalized by the housekeeping protein  $\alpha$ -tubulin and then by the highest value of each experiment considered as 1. (n=3, \* p<0.05, \*\* p < 0.01, \*\*\* p < 0.001, ANOVA with Bonferroni correction).

**(D)** Dispersed human islets were transfected with a luciferase construct reporter containing the wild type human PDL1 promoter or the same construct presenting a deletion in the IRF1 binding site plus a pRL-CMV plasmid (used as internal control); cells were then exposed to IFN $\alpha$  for 24h and luciferase activity was assayed. The values were corrected for the activity of the internal control (pRL-CMV) and are presented as normalized relative luciferase units (RLUs) in relation to non-treated cells (NT) considered as 1 (n=5, \* p < 0.05, \*\*\* p < 0.001, ANOVA with Bonferroni correction). The mean values  $\pm$  SEM are shown.

**Table S1: Tissue Samples, Patient Information.**

| Identifier | Classification  | Age (y)   | Gender | Duration of Disease |
|------------|-----------------|-----------|--------|---------------------|
| 21/89      | No diabetes     | 4         | F      |                     |
| 184/90     | No diabetes     | 5         | M      |                     |
| 333/66     | No diabetes     | 16        | M      |                     |
| 146/66     | No diabetes     | 18        | F      |                     |
| 191/67     | No diabetes     | 25        | M      |                     |
| 9310/08    | No diabetes     | 58        | F      |                     |
| SC115      | Type 1 diabetes | 16 months | F      | 3 days              |
| E308       | Type 1 diabetes | 3         | F      | 4 weeks             |
| SC41       | Type 1 diabetes | 4         | F      | 3 weeks             |
| E261       | Type 1 diabetes | 18        | F      | 3 weeks             |
| E556A      | Type 1 diabetes | 18        | M      | 4 months            |
| E560       | Type 1 diabetes | 42        | F      | 18 months           |
| DiViD1*    | Type 1 diabetes | 25        | F      | 4 weeks             |
| DiViD 2*   | Type 1 diabetes | 24        | M      | 3 weeks             |
| DiViD 3*   | Type 1 diabetes | 34        | F      | 9 weeks             |
| DiViD 4*   | Type 1 diabetes | 31        | M      | 5 weeks             |
| DiViD 5*   | Type 1 diabetes | 24        | F      | 5 weeks             |
| DiViD 6*   | Type 1 diabetes | 35        | M      | 5 weeks             |

\* (5)

**Table S2: Antibody Details and Immunofluorescence Conditions.**

| <b>Primary Antibody</b>         | <b>Manufacturer and clone</b>                     | <b>Antigen Retrieval</b>                  | <b>Antibody Dilution</b> | <b>Incubation time with primary antibody</b> | <b>Secondary Detection System</b>                                                                                                                                          |
|---------------------------------|---------------------------------------------------|-------------------------------------------|--------------------------|----------------------------------------------|----------------------------------------------------------------------------------------------------------------------------------------------------------------------------|
| <b>Step 1: PDL1</b>             | Abcam<br>Cat#ab205921<br>Rabbit monoclonal [28-8] | Abcam<br>Universal buffer (Cat# ab208572) | 1:100                    | Overnight at 4°C                             | Goat anti-rabbit IgG (H+L) HRP then tyramide Alexa 488 (as per manufacturers instructions; Thermofisher TSA Kit#12; Cat#T20927)                                            |
| <b>Step 2: Glucagon or IRF1</b> | Abcam<br>Cat#ab82270<br>Mouse monoclonal          | Abcam<br>Universal buffer                 | 1:2000                   | 1h at RT                                     | Goat anti-mouse IgG (H+L) Alexa Fluor™-conjugated secondary antibodies (1/400 for 1hr)                                                                                     |
|                                 | Cell Signalling<br>Cat#8478<br>Rabbit monoclonal  | Citrate pH6                               | 1:100                    | Overnight at 4°C then 1h at RT               | Goat anti-rabbit IgG (H+L) HRP followed by tyramide amplification (Thermofisher Tyramide SuperBoost Kit (TSA) Cat#B40922) and Alexa Fluor™-conjugated secondary antibodies |
| <b>Step 3: Insulin</b>          | Dako<br>Cat#A0564<br>Guinea-pig polyclonal        | Abcam<br>Universal buffer                 | 1:700                    | 1h at RT                                     | Goat anti-guinea-pig IgG (H+L) Alexa Fluor™ -conjugated secondary antibodies (1/400 for 1hr)                                                                               |



**Table S3. Characteristics of the human islets donors.**

|                   | <b>Age (y)</b>    | <b>Gender</b> | <b>BMI (kg/m<sup>2</sup>)</b> | <b>Cause of death</b>     | <b>Beta cell purity (%)</b> |
|-------------------|-------------------|---------------|-------------------------------|---------------------------|-----------------------------|
| Donor 1           | 63                | F             | 27.3                          | Stroke                    | 58                          |
| Donor 2           | 64                | F             | 22.2                          | Cerebral haemorrhage      | 39.1                        |
| Donor 3           | 71                | F             | 31.2                          | Cerebral haemorrhage      | 46                          |
| Donor 4           | 72                | F             | 22.9                          | Cardiovascular disease    | 45                          |
| Donor 5           | 73                | M             | 24.1                          | Cerebral haemorrhage      | Not available               |
| Donor 6           | 82                | M             | 22.5                          | Trauma                    | 62                          |
| Donor 7           | 87                | M             | 35.1                          | Trauma                    | 75                          |
| Donor 8           | 60                | F             | 23.4                          | Postanoxic encephalopathy | 23.8                        |
| Donor 9           | 67                | M             | 25.7                          | Trauma                    | 48                          |
| Donor 10          | 76                | M             | 26.6                          | Stroke                    | 62                          |
| <b>Mean ± SEM</b> | <b>71.5 ± 2.8</b> |               | <b>26.1 ± 1.4</b>             |                           | <b>51.0 ± 5.0</b>           |

Beta cell purity was determined by immunofluorescence for insulin as described (6).

**Table S4. List of siRNAs and primers used in the present study.**

|                                          | <b>Distributor</b>         | <b>Sequence</b>                                        |
|------------------------------------------|----------------------------|--------------------------------------------------------|
| <b>siRNAs</b>                            |                            |                                                        |
| siCTL                                    | Qiagen, Venlo, Netherlands | Allstars Negative Control siRNA, sequence not provided |
| Human si <i>STAT1</i>                    | Invitrogen, Pasley, UK     | 5'- GGAUUGAAAGCAUCCUAGAACUCAU -3'                      |
| Human si <i>STAT2</i>                    | Invitrogen, Pasley, UK     | 5'- CAGCAGCAUGUCUUCUGCUUCCGAU -3'                      |
| Human si <i>JAK1</i> #1                  | Qiagen, Venlo, Netherlands | 5'- CCAAAGCAATTGAAACCGATA -3'                          |
| Human si <i>JAK1</i> #2                  | Qiagen, Venlo, Netherlands | 5'- CACGGATAACATCAGCTTCAT -3'                          |
| Human si <i>IRF1</i> #1                  | Qiagen, Venlo, Netherlands | 5'- CTGGCTAGAGATGCAGATTAA -3'                          |
| Human si <i>IRF1</i> #2                  | Qiagen, Venlo, Netherlands | 5'- CAAGCATGGCTGGGACATCAA -3'                          |
| <b>Primers</b>                           |                            |                                                        |
| Human <i>β-actin</i> –<br><i>Forward</i> | ThermoFischer              | 5'- CTGTACGCCAACACAGTGCT- 3'                           |
| Human <i>β-actin</i> –<br><i>Reverse</i> | ThermoFischer              | 5'- GCTCAGGAGGAGCAATGATC – 3'                          |
| Human <i>STAT1</i> -<br><i>Forward</i>   | ThermoFischer              | 5'- GACCCAATCCAGATGTCTATGA – 3'                        |
| Human <i>STAT1</i> -<br><i>Reverse</i>   | ThermoFischer              | 5'- CCCGACTGAGCCTGATTA – 3'                            |
| Human <i>STAT2</i> -<br><i>Forward</i>   | ThermoFischer              | 5'- GTTGGCAGTTCTCCTCCTATG – 3'                         |
| Human <i>STAT2</i> -<br><i>Reverse</i>   | ThermoFischer              | 5'- GAAGTCAGCCCAGGACAATAA – 3'                         |
| Human <i>JAK1</i> -<br><i>Forward</i>    | ThermoFischer              | 5'- CTCACCAGGATGGGGATAAA – 3'                          |
| Human <i>JAK1</i> -<br><i>Reverse</i>    | ThermoFischer              | 5'- AGTTTCCAAGGTAGCCAAGTAT – 3'                        |
| Human <i>PDL1</i> -<br><i>Forward</i>    | ThermoFischer              | 5'- CCAGTCACCTCTGAACATGAA – 3'                         |
| Human <i>PDL1</i> -<br><i>Reverse</i>    | ThermoFischer              | 5'- ACTTGATGGTCACTGCTTGT – 3'                          |

**Table S5. List of antibodies used in the present study.**

|                                                                    | SOURCE                      | IDENTIFIER                         |
|--------------------------------------------------------------------|-----------------------------|------------------------------------|
| Antibodies                                                         |                             |                                    |
| PDL1                                                               | Abcam                       | Cat#ab205921;<br>RRID:AB_2687878   |
| Glucagon                                                           | Abcam                       | Cat#ab82270;<br>RRID: AB_1658481   |
| Insulin                                                            | Dako                        | Cat#A0564;<br>RRID: AB_10013624    |
| $\alpha$ -tubulin                                                  | Sigma                       | Cat#T9026;<br>RRID:AB_477593       |
| IRF1                                                               | Cell signaling              | Cat#8478;<br>RRID: AB_10949108     |
| CD8                                                                | Abcam                       | Cat#Ab4055<br>RRID: AB_304247      |
| phospho-STAT1                                                      | Cell signaling              | Cat#9167<br>RRID: AB_561284        |
| phospho-STAT2                                                      | Cell signaling              | Cat#88410<br>RRID: N/A             |
| total STAT1                                                        | Cell signaling              | Cat#14495<br>RRID: AB_2716280      |
| total STAT2                                                        | Cell signaling              | Cat#72604<br>RRID: N/A             |
| JAK1                                                               | Abcam                       | Cat#ab133666                       |
| Peroxidase- conjugated donkey anti-rabbit IgG                      | Jackson<br>ImmunoResearch   | Cat#715-036-152<br>RRID:AB_2340590 |
| Peroxidase- conjugated donkey anti-mouse IgG                       | Jackson<br>ImmunoResearch   | Cat#711-036-150<br>RRID:AB_2340773 |
| Goat anti-Rabbit IgG (H+L) Secondary Antibody, Alexa Fluor 647     | Thermo Fisher<br>Scientific | Cat#A27040;<br>RRID:AB_2536101     |
| Goat anti-Guinea Pig IgG (H+L) Secondary Antibody, Alexa Fluor 488 | Thermo Fisher<br>Scientific | Cat#A-11073;<br>RRID:AB_2534117    |

**References:**

1. Mastracci TL, Turatsinze JV, Book BK, Restrepo IA, Pugia MJ, Wiebke EA, et al. Distinct gene expression pathways in islets from individuals with short- and long-duration type 1 diabetes. *Diabetes Obes Metab.* 2018.
2. Fadista J, Vikman P, Laakso EO, Mollet IG, Esguerra JL, Taneera J, et al. Global genomic and transcriptomic analysis of human pancreatic islets reveals novel genes influencing glucose metabolism. *Proceedings of the National Academy of Sciences of the United States of America.* 2014;111(38):13924-9.
3. Cnop M, Abdulkarim B, Bottu G, Cunha DA, Igoillo-Esteve M, Masini M, et al. RNA sequencing identifies dysregulation of the human pancreatic islet transcriptome by the saturated fatty acid palmitate. *Diabetes.* 2014;63(6):1978-93.
4. Eizirik DL, Sammeth M, Bouckenooghe T, Bottu G, Sisino G, Igoillo-Esteve M, et al. The human pancreatic islet transcriptome: expression of candidate genes for type 1 diabetes and the impact of pro-inflammatory cytokines. *PLoS Genet.* 2012;8(3):e1002552.
5. Krogvold L, Edwin B, Buanes T, Ludvigsson J, Korsgren O, Hyoty H, et al. Pancreatic biopsy by minimal tail resection in live adult patients at the onset of type 1 diabetes: experiences from the DiViD study. *Diabetologia.* 2014;57(4):841-3.
6. Marroqui L, Dos Santos RS, Op de Beek A, Coomans de Brachene A, Marselli L, Marchetti P, et al. Interferon-alpha mediates human beta cell HLA class I overexpression, endoplasmic reticulum stress and apoptosis, three hallmarks of early human type 1 diabetes. *Diabetologia.* 2017;60(4):656-67.
